# Supplementary material
Source: Springer Nature journal article supplement (https://www.springermedizin.de/resource/supplementary/12913_2007_619_MOESM1_ESM.pdf/9535806)
Supplement: MOESM1 [file 9535806]

**Total Emergency care episodes in 2004**

127,428

Spanish-born 70.3%

Foreign-born 29.7%

Outside the city of  
Barcelona

**26,286**

20.6 %

**Study Area**

(4 Basic Areas of the city of Barcelona)

**37,412**

29.3 %

Remaining 62 Basic Areas  
of the city of Barcelona

**63,730**

50.0 %

**Health card?**

Yes

No

**Exclusion of 3,900  
Children under 15**

**Emergency contacts with health card**

**29,451**

**Spanish-born**

19,227

**65.3%**

**Foreign-born**

10,224

**34.7%**

**Emergency contacts without  
health card**

4,061

**Spanish-born**

1,036

**25.5%**

**Foreign-born**

3,025

**74.5%**

**Emergency contacts analysed in this study**
